# Supplementary material
Source: Springer Nature journal article supplement (https://www.springermedizin.de/resource/supplementary/13223_2009_93_MOESM1_ESM.pdf/9597244)
Supplement: MOESM1 [file 9597244]

| Case                                | Gender | Age | BMI  | Met | SU  | Insulin | HbA1c   | Glucose improved | Weight loss |
|-------------------------------------|--------|-----|------|-----|-----|---------|---------|------------------|-------------|
| <b>Sitagliplin Intolerant Group</b> |        |     |      |     |     |         |         |                  |             |
| 1                                   | F      | 55  | 31.1 | Yes | Yes | No      | 5.9     | Yes              | No          |
| 2                                   | F      | 56  | 23.1 | Yes | Yes | No      | 8.3/7.2 | Yes              | Yes         |
| 3                                   | F      | 55  | 48.1 | Yes | Yes | No      | 8.9     | No               | 20 kg       |
| 4                                   | M      | 66  | 29.1 | Yes | Yes | No      | 7.8/9.2 | Yes              | No          |
| 5                                   | F      | 71  | 38.0 | Yes | Yes | No      | 7.8     | Yes              | No          |
| 6                                   | F      | 64  | 42.1 | No  | No  | Yes     | 9.9     | Yes              | No          |
| 7 <sup>†</sup>                      | F      | 60  | 39.3 | Yes | Yes | No      | 6.2     | Yes              | No          |
| 8                                   | F      | 38  | 33.0 | Yes | Yes | No      | 9.1     | Yes              | Yes         |
| 9                                   | M      | 69  | 47.7 | No  | Yes | No      | 7.3     | Yes              | No          |
| 10                                  | F      | 75  | 29.2 | No  | Yes | No      | 8.4     | Yes              | No          |
| 11                                  | M      | 32  | 37.7 | Yes | Yes | No      | 8.8     | Yes              | No          |
| 12                                  | F      | 63  | 32.5 | Yes | Yes | No      | 8.2     | Yes              | Yes         |
| 13                                  | M      | 62  | 19.0 | Yes | No  | No      | 8.1     | Yes              | Yes         |
| 14                                  | F      | 59  | 43.0 | Yes | No  | No      | 10.6    | Yes              | No          |
| 15                                  | F      | 39  | 39.0 | Yes | Yes | No      | 10.2    | Yes              | Yes         |
| <b>Sitagliptin Tolerant Group</b>   |        |     |      |     |     |         |         |                  |             |
| 16*                                 | F      | 69  | 30.3 | No  | Yes | No      | 6.4     | Yes              | Yes         |
| 17                                  | F      | 61  | 35.7 | No  | Yes | No      | 7.3     | Yes              | No          |
| 18*                                 | F      | 59  | 41.1 | No  | No  | Yes     | 10      | Yes              | n.d.        |
| 19                                  | F      | 52  | 29.6 | Yes | No  | No      | 8.9     | Yes              | n.d.        |
| 20                                  | M      | 44  | 34.0 | Yes | No  | No      | 7.1     | Yes              | Yes         |
| 21                                  | F      | 72  | 23.8 | Yes | Yes | No      | 7.6     | Yes              | No          |
| 22                                  | M      | 58  | 28.8 | Yes | Yes | No      | 9.2     | Yes              | No          |
| 23                                  | M      | 77  | 28.8 | Yes | Yes | No      | 8.4     | Yes              | No          |
| 24 <sup>†</sup>                     | M      | 64  | 41.6 | No  | No  | Yes     | 8.2     | Yes              | No          |
| 25                                  | F      | 48  | 42.7 | Yes | Yes | No      | 7.6     | No               | Yes         |
| 26                                  | M      | 64  | 25.9 | Yes | Yes | No      | 7.7     | Yes              | No          |
| 27                                  | F      | 53  | 35.3 | No  | No  | Yes     | 8.6     | Yes              | No          |
| 28                                  | M      | 38  | 33.0 | Yes | No  | No      | 7.5     | Yes              | Yes         |
| 29                                  | M      | 52  | 38.5 | Yes | Yes | Yes     | 12.0    | Yes              | No          |
| 30                                  | F      | 30  | 40.6 | Yes | Yes | No      | 8.7     | Yes              | No          |
| 31                                  | M      | 38  | 35.7 | No  | No  | No      | 6.7     | Yes              | No          |
| 32                                  | M      | 55  | 39.4 | Yes | No  | No      | 9.0     | Yes              | Yes         |
| 33                                  | F      | 51  | 38.5 | Yes | No  | No      | 9.1     | Yes              | Yes         |
